# Supplementary material
Source: PubMed Central journal article supplement (PMC5775917)
Supplement: NIHMS933822-supplement-supplemental.pdf [file NIHMS933822-supplement-supplemental.pdf]

## **Extraction of MicroRNAs from Biological Matrices with Titanium Dioxide Nanofibers**

Luis A Jimenez<sup>2</sup>, Marissa A. Gionet-Gonzales<sup>1</sup>, Sabrina Sedano<sup>1</sup>, Jocelyn G. Carballo<sup>1</sup>, Yomara

Mendez<sup>1</sup>, Wenwan Zhong<sup>1</sup>, \*

Department of Chemistry<sup>1</sup>, Program in Biomedical Sciences<sup>2</sup>, University of California,

Riverside, CA USA 92521

### **Electronic Supplementary Information**

Table of Contents:

1. Supporting Tables
  - a. Table S1: Sequence of DNA and miRNA used for recovery
  - b. Table S2: Absorption wavelength of guanidine HCl and elution
2. Supporting Figures
  - a. Figure S1: TiO<sub>2</sub> fiber measurements
  - b. Figure S2: Recovery of cel-miR-67 spiked into water
  - c. Figure S3: Phosphate buffer elution at various concentrations
  - d. Figure S4: Recovery of total RNA with the fibers using the total RNA Pico chip

**Table S1.** Sequence of DNA and miRNA used for recovery.

| <b>DNA/<br/>RNA</b>    | <b>Sequence</b>                                                                      |
|------------------------|--------------------------------------------------------------------------------------|
| WA<br>DNA              | AGCAGCACAGACGTCAGATGATGGGGCACGTTTATCCGTCCCTCCTAGTG<br>GCGTGCCCCTCCTATGCGTGCTACCGTCAA |
| cel-<br>miR-<br>54-3p  | UACCCGUAUAUCUUCAUAAUCCGAG                                                            |
| hsa-<br>miR-<br>21-5p  | UAGCUUAUCAGACUGAUGUUGA                                                               |
| hsa-<br>miR-<br>191-5p | CAACGGAAUCCCAAAGCAGCUG                                                               |

**Table S2.** Absorption wavelength of 1 M guanidine HCl sample compared to an elution of extraction after undergoing washes. Guanidine HCl, which absorbs at 230 nm, is greatly reduced after washes.

| <b><math>\lambda</math> of Absorbance</b> | <b>220 nm</b> | <b>230 nm</b> | <b>250 nm</b> |
|-------------------------------------------|---------------|---------------|---------------|
| Guandine HCl                              | 0.373         | 0.555         | 0.058         |
| Elution in TE                             | 0.112         | 0.062         | 0.000         |

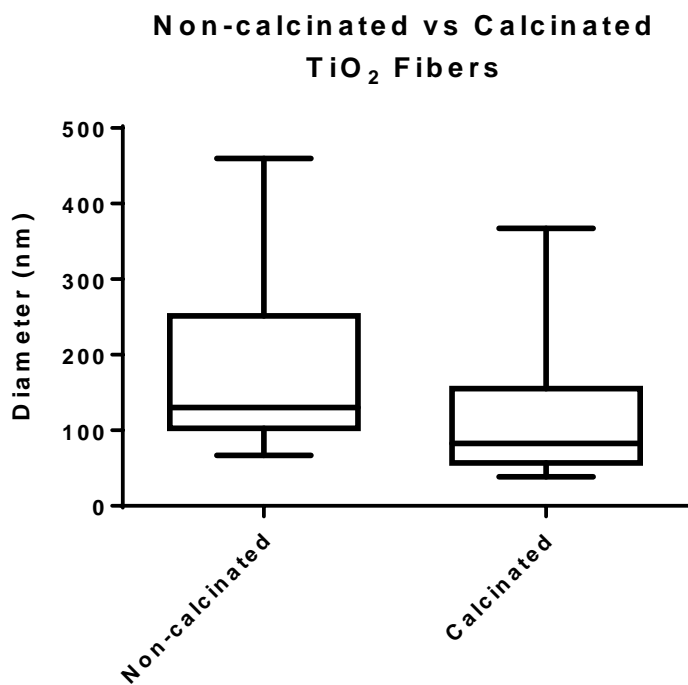

**Figure S1.** TiO<sub>2</sub> fiber measurements were done using imageJ and scanning electron microscopy images. The pre-calcinated fibers (n = 169) had an overall larger diameter than the post-calcinated fibers (n = 62) with averages of 191.5 nm and 126.5 nm respectively.

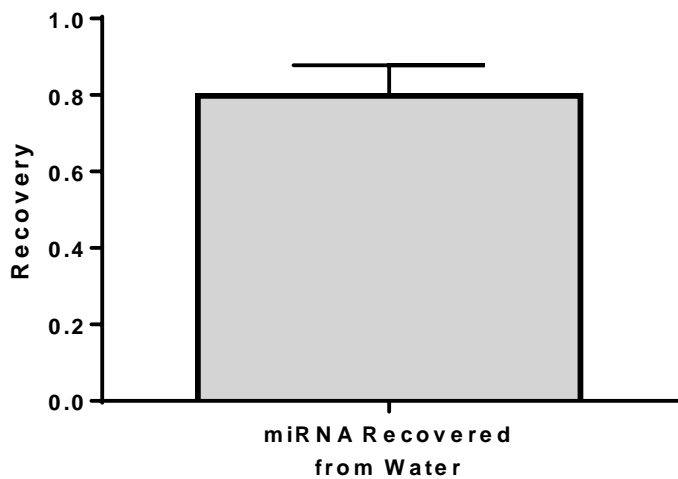

**Figure S2.** Recovery of cel-miR-67 spiked into water using the TiO<sub>2</sub> fibers was 79.8±0.05% (n = 3).

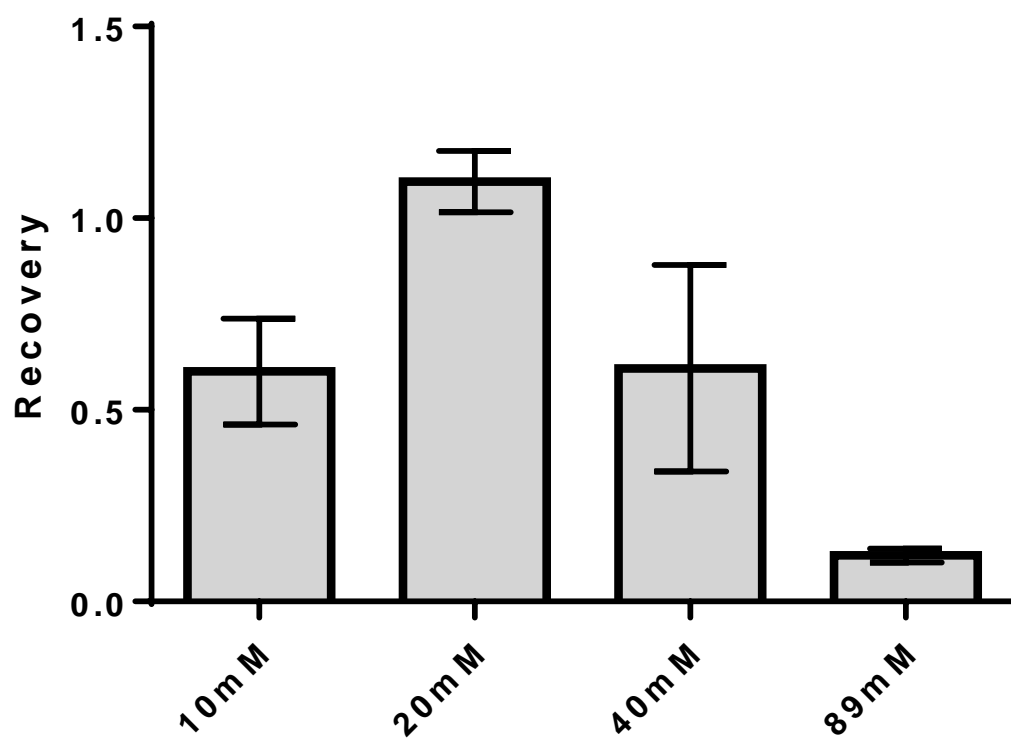

**Figure S3.** Phosphate buffer (PB) elution at various concentrations (n = 3) to see the effect on DNA detection with qPCR. At 40 mM phosphate and higher, we started to see a decrease in the amount of DNA detected using qPCR.

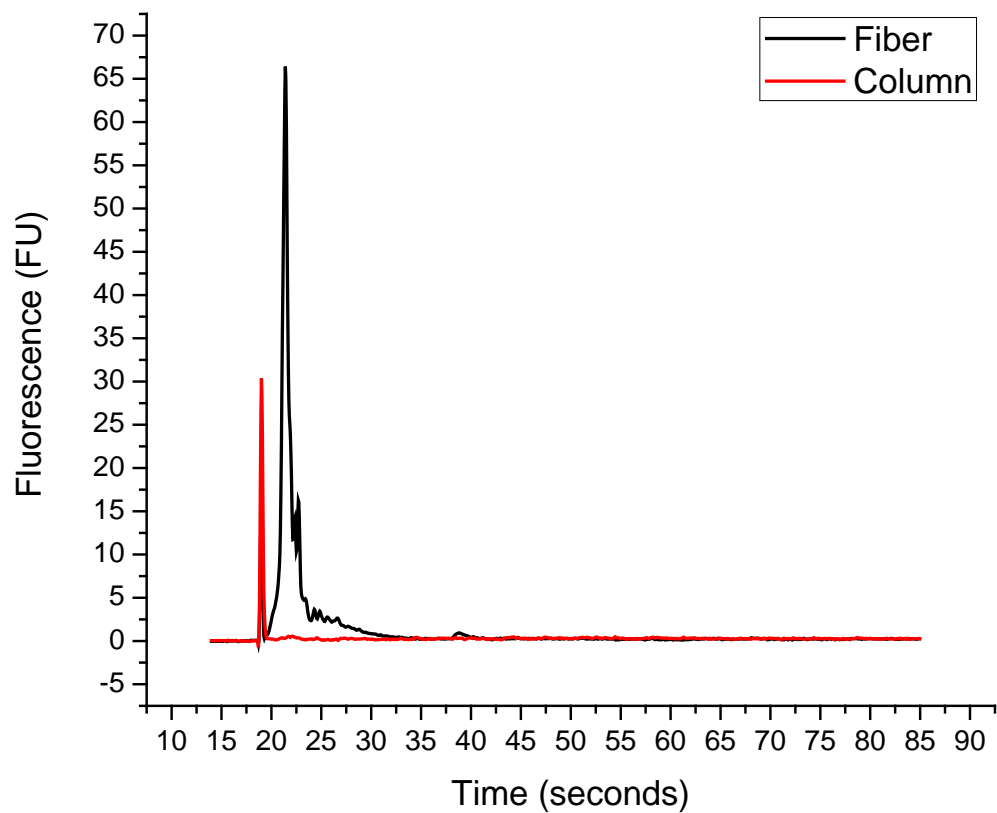

**Figure S4.** Recovery of total RNA from MDA-MB-231 cells with the fibers and columns using the total RNA Pico chip. The RNA recovered by the fibers was in the lower range, below 1000 nt.
